# Supplementary material for: Modulating the bandgap of Cr-intercalated bilayer graphene via combining the 18-electron rule and the 2D superatomic-molecule theory
Source: Royal Society of Chemistry journal article supplement (doi:10.1039/d4nr02440k), 2024-01-01
Supplement: d4nr02440k1.pdf [file d4nr02440k1.pdf]

## Supplementary Information

### Modulating the bandgap of Cr-intercalated bilayer graphene via combining the 18-electron rule and the 2D superatomic-molecule theory

Dan Li<sup>a#</sup>, Zaijun Gui<sup>a#</sup>, Mengxuan Ling<sup>a</sup>, Lijiao Guo<sup>a</sup>, Zhifang Wang<sup>a</sup>, Qinqin Yuan<sup>a\*</sup>, and Longjiu Cheng<sup>a,b\*</sup>

<sup>a</sup>*Department of Chemistry, Anhui University, Hefei, 230601, P. R. China.*

<sup>b</sup>*Key Laboratory of Structure and Functional Regulation of Hybrid Materials (Anhui University), Ministry of Education, Hefei, 230601, P. R. China.*

\* Authors to whom correspondence should be addressed.

Electronic mails: [clj@ustc.edu](mailto:clj@ustc.edu) (L. Cheng)

[qinqinyuan@ahu.edu.cn](mailto:qinqinyuan@ahu.edu.cn) (Q. Yuan)

# These authors contributed equally to this work.

## Contents:

- 1. Fig. S1** Chemical bonding picture of  $\text{Cr}(\text{C}_6\text{H}_6)_2$ .
- 2. Fig. S2** Chemical bonding picture of  $\text{Cr}_3\text{C}_{36}\text{H}_{24}$ .
- 3. Fig. S3** Energy fluctuation depending on simulated time in molecular dynamics simulation of  $\text{C}_{12}\text{Cr}$  monolayer at 1000 K after 5 ps simulation.
- 4. Fig. S4** Energy fluctuation depending on simulated time in molecular dynamics simulation of  $\text{C}_{12}\text{Cr}$  monolayer at 1500 K after 5 ps simulation.
- 5. Fig. S5** Energy fluctuation depending on simulated time in molecular dynamics simulation of  $\text{C}_{12}\text{Cr}$  monolayer at 2000 K after 5 ps simulation.
- 6. Fig. S6** (a) Separating one monolayer from neighboring four layers. (b) Cleavage energy as a function of the separation distance for a fracture in  $\text{C}_{12}\text{Cr}$  bulk.
- 7. Fig. S7** Crystal orbital Hamilton population (COHP) between C atoms and Cr atoms of (a)  $\text{C}_{12}\text{Cr}$  and (b)  $\text{C}_{48}\text{Cr}$  monolayer.
- 8. Fig. S8** Chemical bonding picture of  $\text{C}_{12}\text{Cr}$  monolayer.
- 9. Fig. S9** Chemical bonding picture of  $\text{Cr}(\text{C}_{54}\text{H}_{18})_2$ .
- 10. Fig. S10** Phonon dispersion of  $\text{C}_{48}\text{Cr}$  monolayer.
- 11. Fig. S11** Energy fluctuation depending on simulated time in molecular dynamics simulation of  $\text{C}_{48}\text{Cr}$  monolayer at 500 K after 5 ps simulation.
- 12. Fig. S12** Energy fluctuation depending on simulated time in molecular dynamics simulation of  $\text{C}_{48}\text{Cr}$  monolayer at 1000 K after 5 ps simulation.
- 13. Fig. S13** Energy fluctuation depending on simulated time in molecular dynamics simulation of  $\text{C}_{48}\text{Cr}$  monolayer at 1500 K after 5 ps simulation.
- 14. Fig. S14** Energy fluctuation depending on simulated time in molecular dynamics simulation of  $\text{C}_{48}\text{Cr}$  monolayer at 2000 K after 5 ps simulation.
- 15. Fig. S15** Total energy and a snapshot of  $\text{C}_{48}\text{Cr}$  monolayer with 8  $\text{O}_2$  molecules after a 5 ps AIMD simulation at 300 K.
- 16. Fig. S16** (a) Separating one monolayer from neighboring four layers. (b) Cleavage energy as a function of the separation distance for a fracture in  $\text{C}_{48}\text{Cr}$  bulk.
- 17. Fig. S17** ELF contour planes in the graphene layer (top) and in the Cr and C plane (below).
- Fig. S18** Crystal orbital Hamilton population (COHP) between C atoms and Cr atoms of  $\text{C}_{48}\text{Cr}$  monolayer.
- 19. Fig. S19** SSAdNDP chemical bonding pattern of the  $\text{C}_{48}\text{Cr}$  monolayer.
- 20. Structural information of  $\text{Cr}_{12}\text{C}$  monolayer**
- 21. Structural information of  $\text{Cr}_{48}\text{C}$  monolayer**

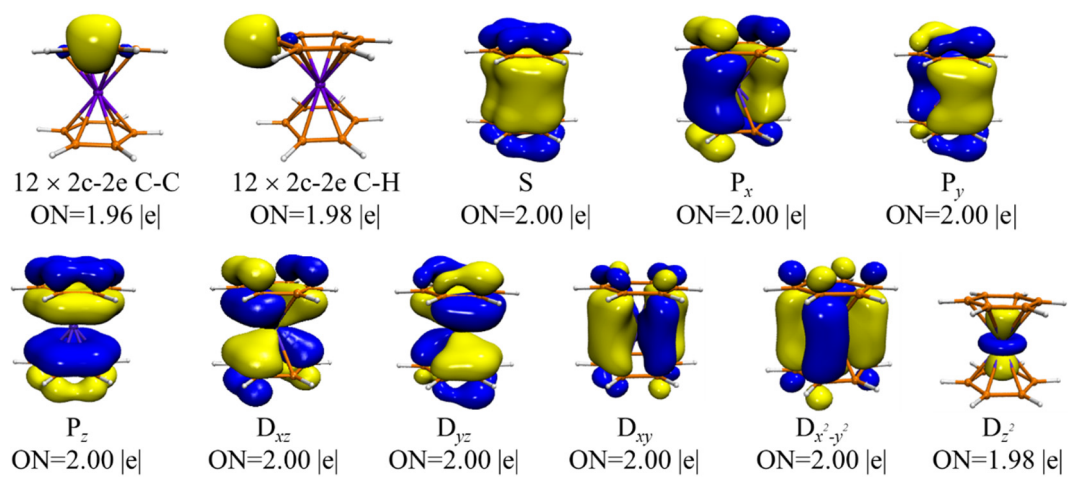

**Fig. S1** Chemical bonding picture of  $\text{Cr}(\text{C}_6\text{H}_6)_2$

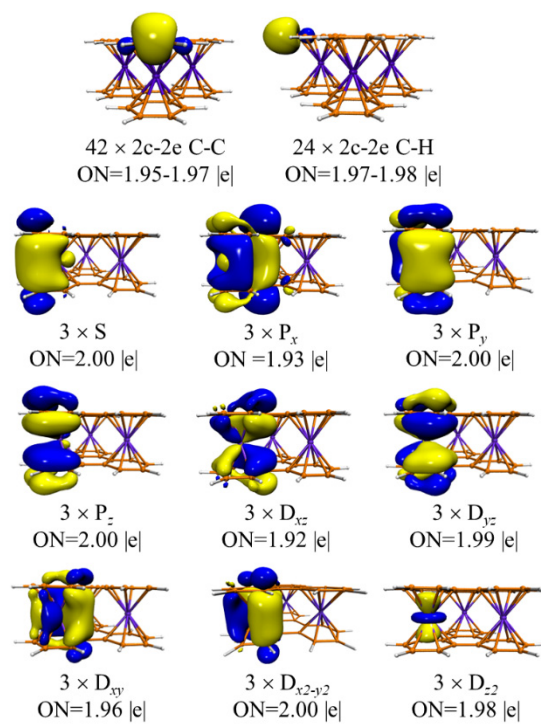

**Fig. S2** Chemical bonding picture of  $Cr_3C_{36}H_{24}$ .

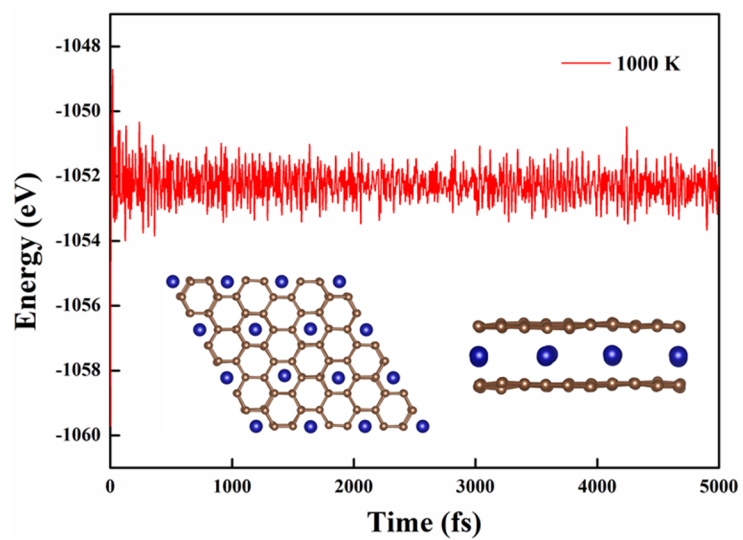

**Fig. S3** Energy fluctuation depending on simulated time in molecular dynamics simulation of C<sub>12</sub>Cr monolayer at 1000 K after 5 ps simulation.

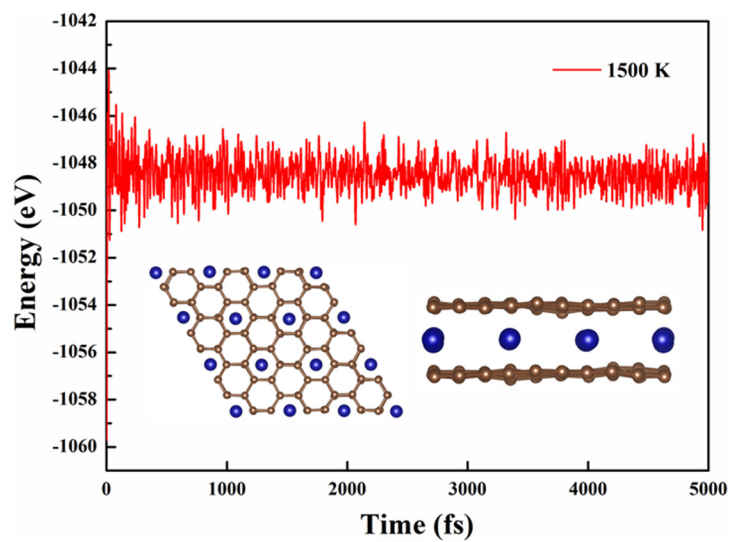

**Fig. S4** Energy fluctuation depending on simulated time in molecular dynamics simulation of C<sub>12</sub>Cr monolayer at 1500 K after 5 ps simulation.

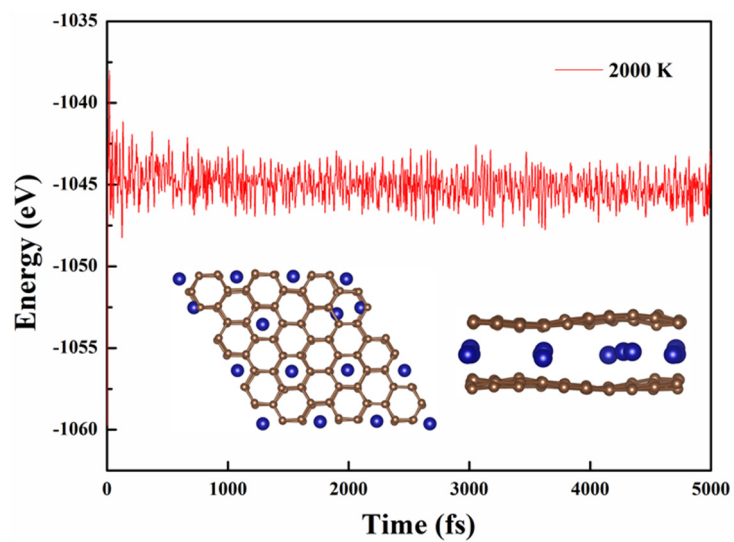

**Fig. S5** Energy fluctuation depending on simulated time in molecular dynamics simulation of C<sub>12</sub>Cr monolayer at 2000 K after 5 ps simulation.

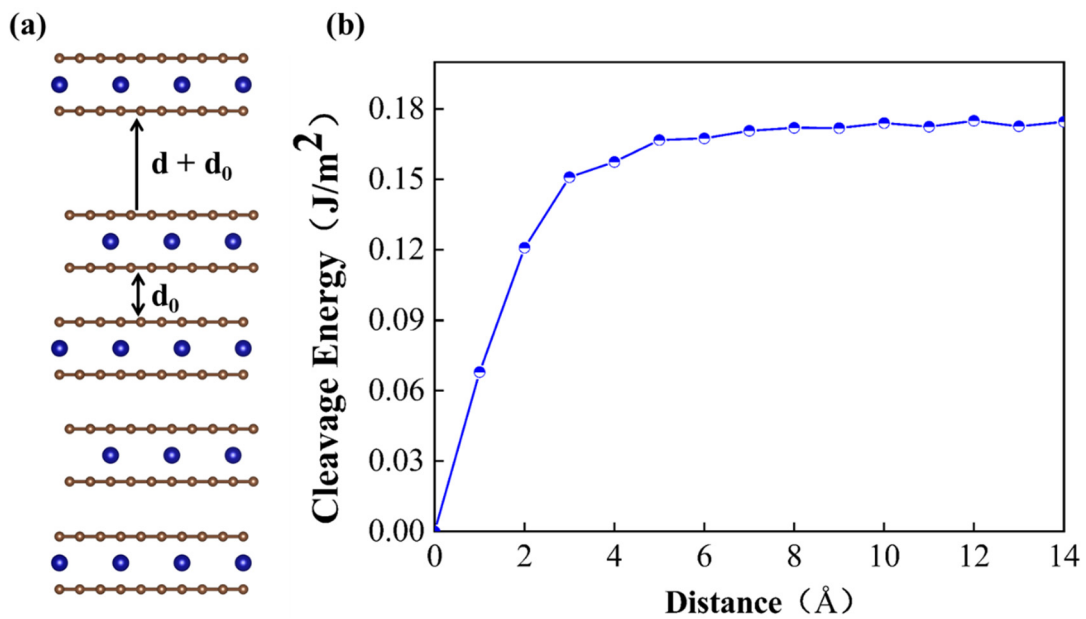

**Fig. S6** (a) Separating one monolayer from neighboring four layers. (b) Cleavage energy as a function of the separation distance for a fracture in  $\text{C}_{12}\text{Cr}$  bulk.



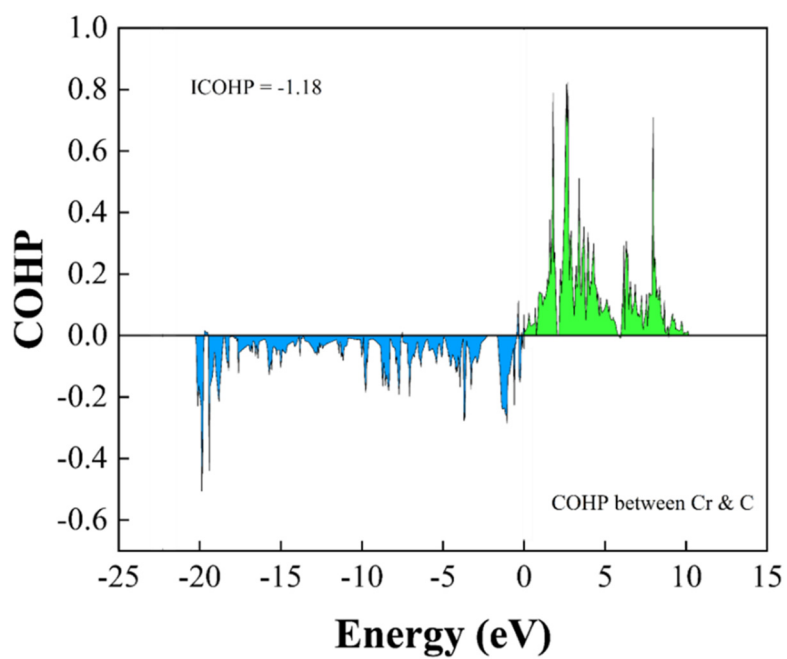

**Fig. S7** Crystal orbital Hamilton population (COHP) between C atoms and Cr atoms of C<sub>12</sub>Cr monolayer. The Fermi level in COHP figures is set to 0 eV.

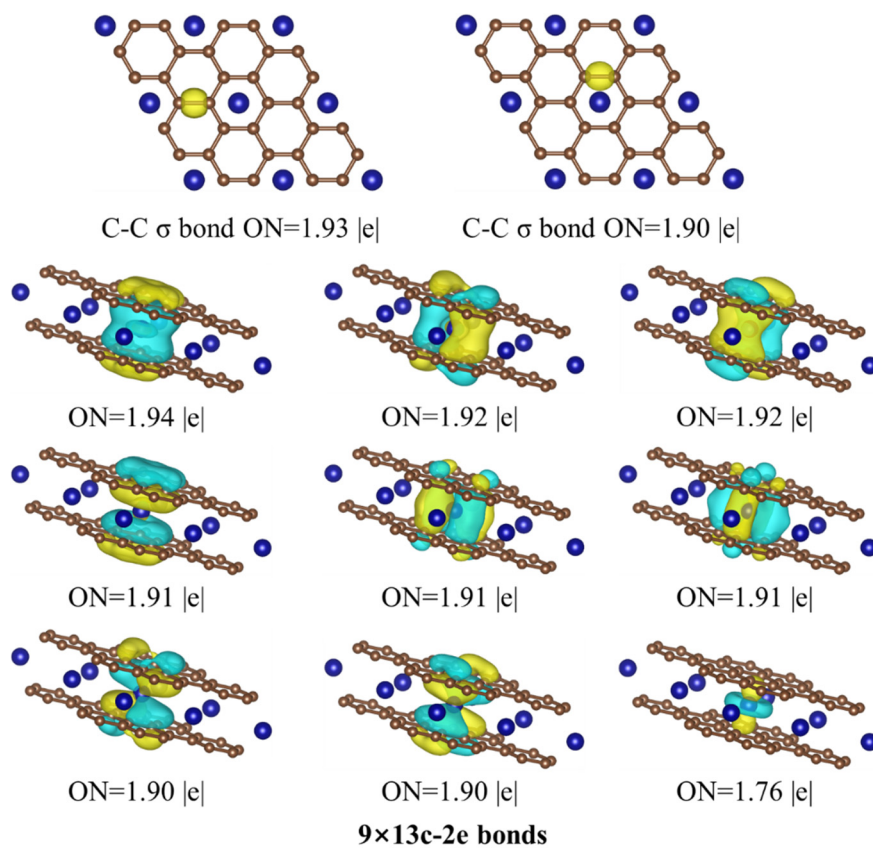

**Fig. S8** Chemical bonding picture of C<sub>12</sub>Cr monolayer.

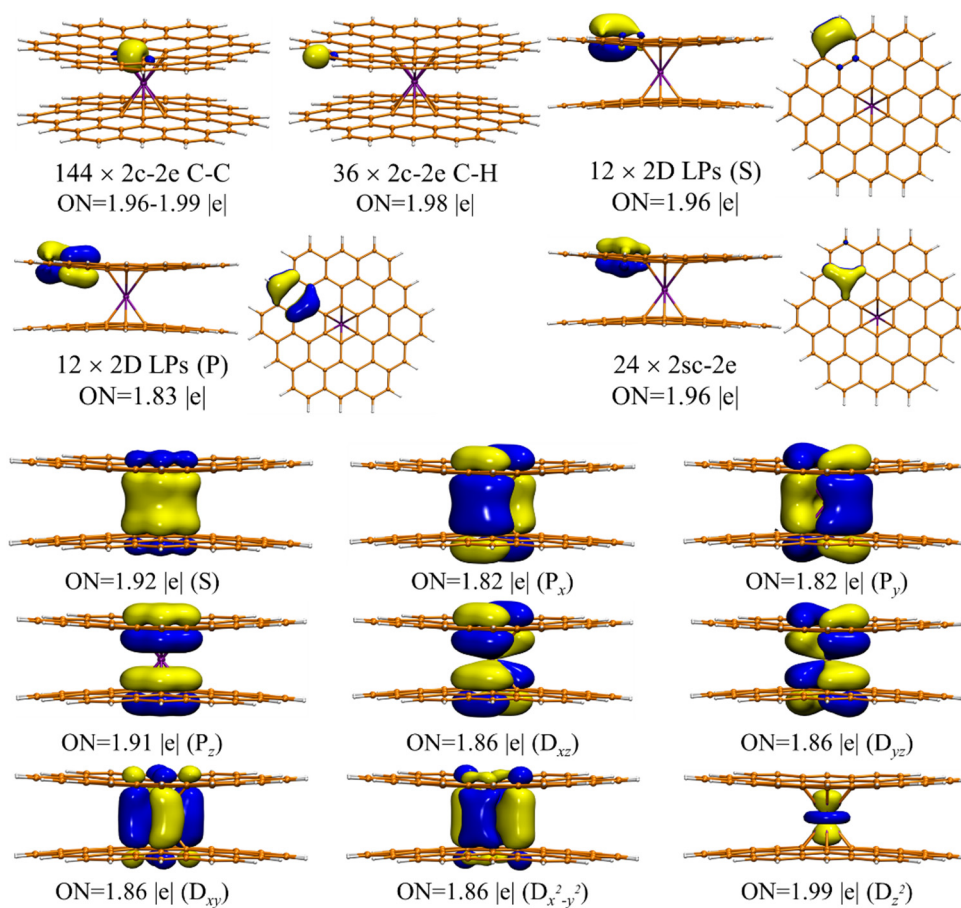

**Fig. S9** Chemical bonding picture of  $Cr(C_{54}H_{18})_2$ .

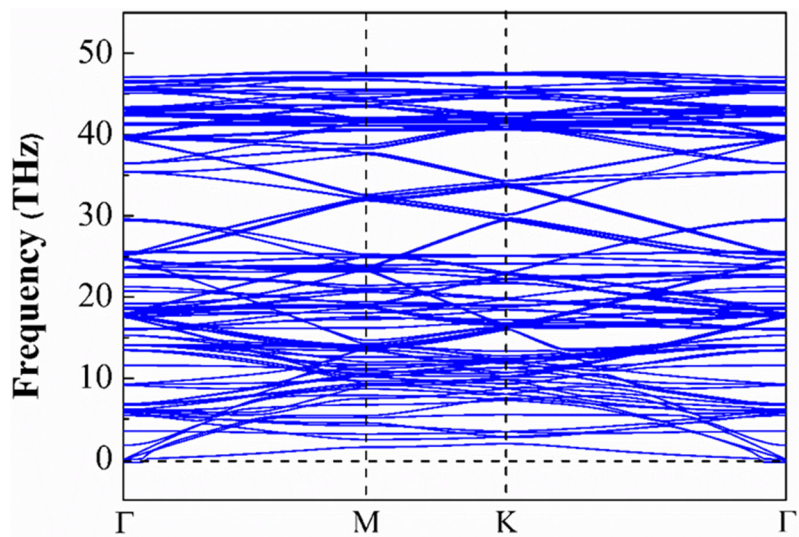

**Fig. S10** Phonon dispersion of C<sub>48</sub>Cr monolayer.

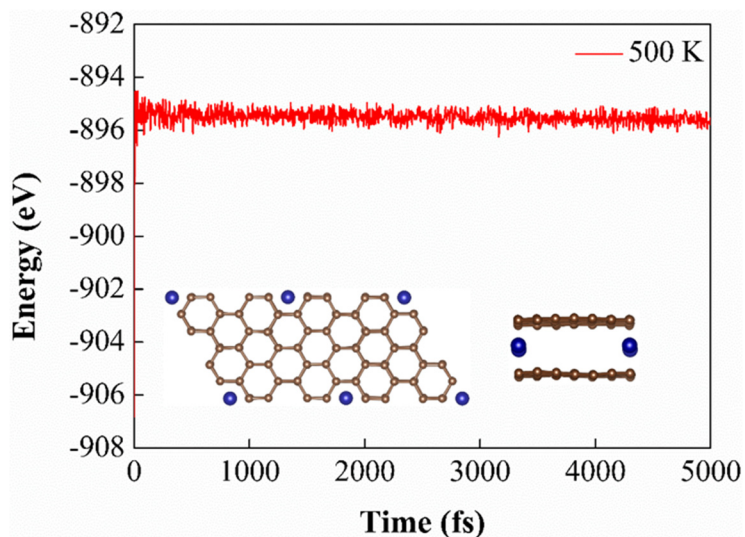

**Fig. S11** Energy fluctuation depending on simulated time in molecular dynamics simulation of C<sub>48</sub>Cr monolayer at 500 K after 5 ps simulation.

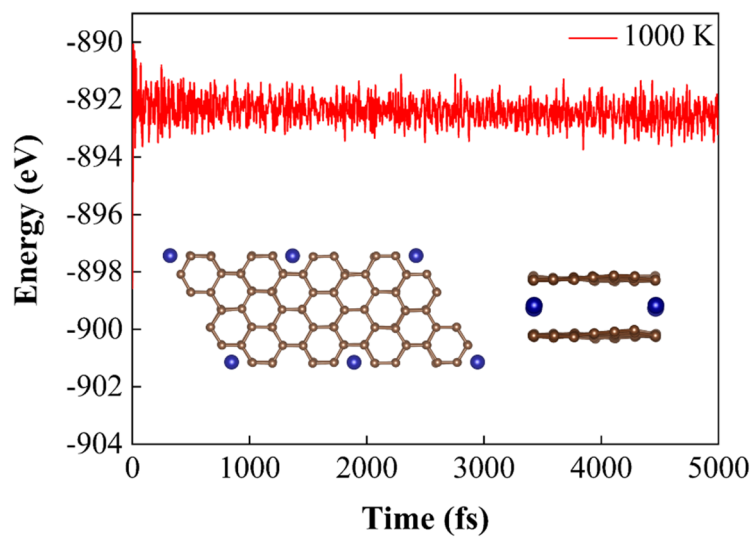

**Fig. S12** Energy fluctuation depending on simulated time in molecular dynamics simulation of C<sub>48</sub>Cr monolayer at 1000 K after 5 ps simulation.

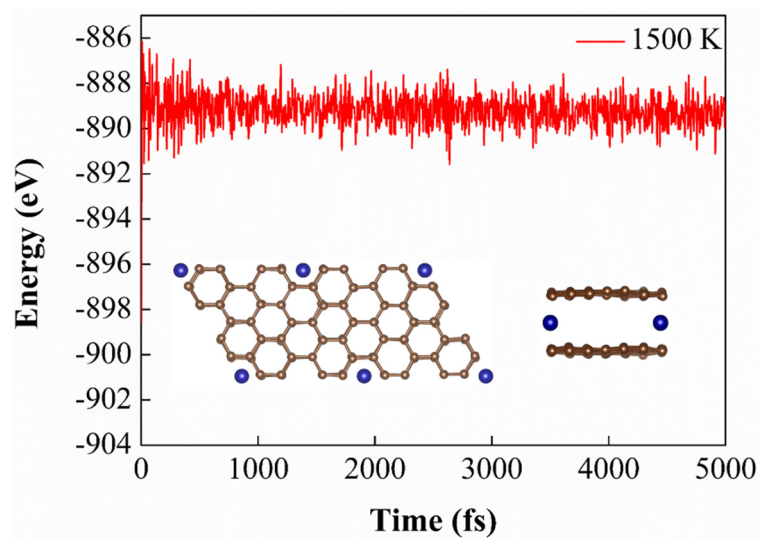

**Fig. S13** Energy fluctuation depending on simulated time in molecular dynamics simulation of  $C_{48}Cr$  monolayer at 1500 K after 5 ps simulation.

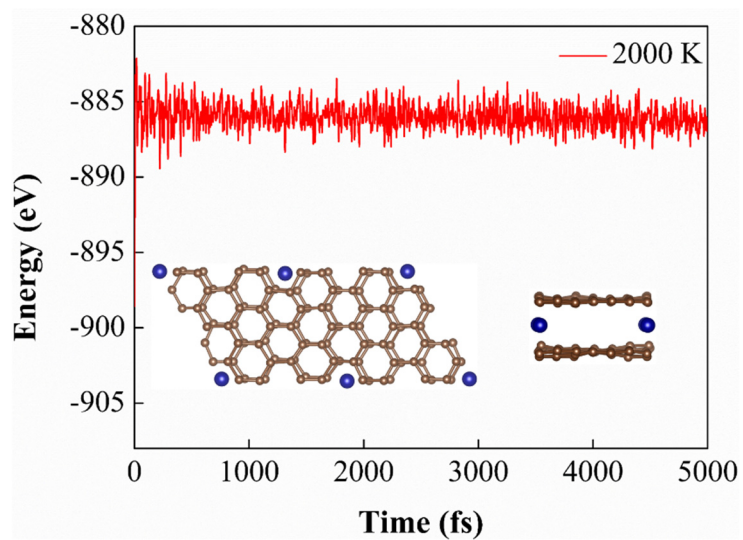

**Fig. S14** Energy fluctuation depending on simulated time in molecular dynamics simulation of C<sub>48</sub>Cr monolayer at 2000 K after 5 ps simulation.



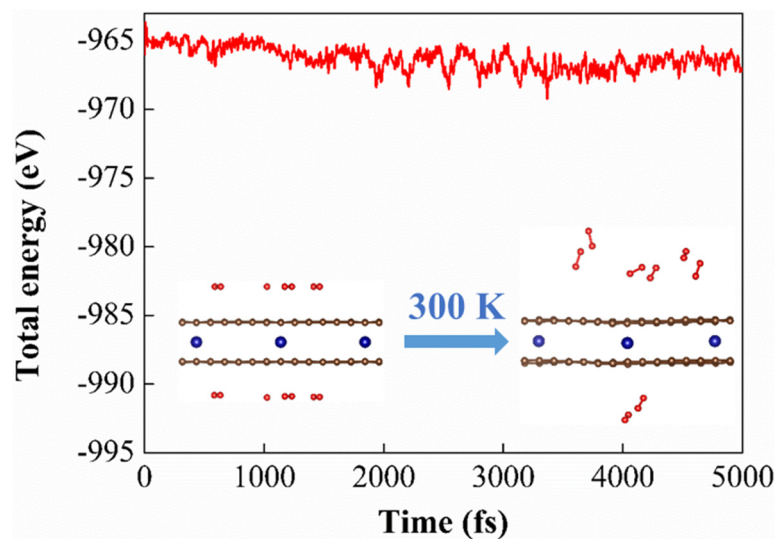

**Fig. S15** Total energy and a snapshot of  $C_{48}Cr$  monolayer with 8  $O_2$  molecules after a 5 ps AIMD simulation at 300 K.

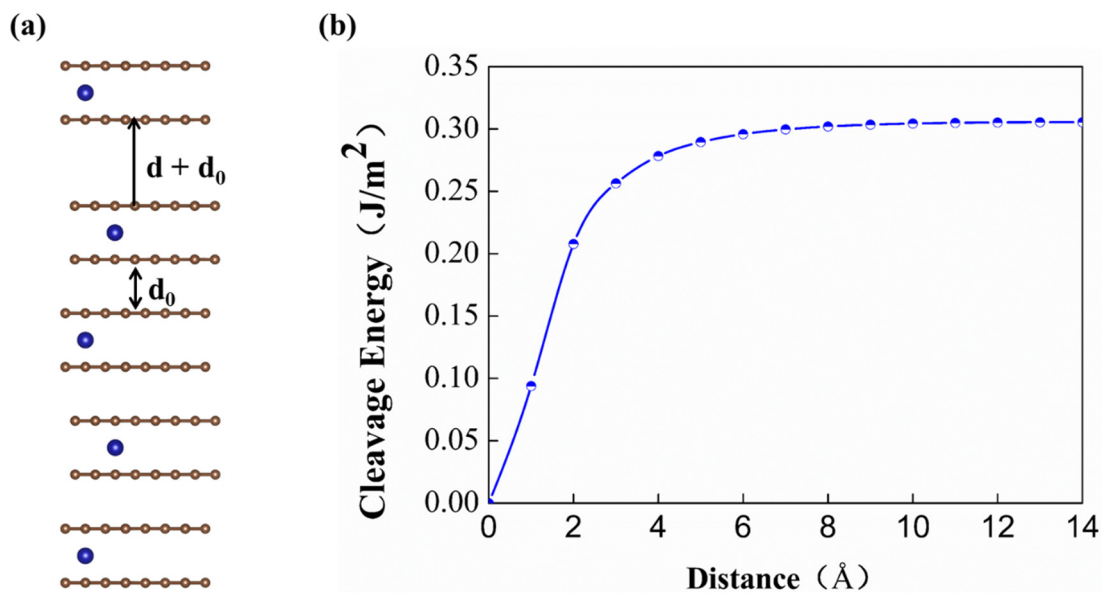

**Fig. S16** (a) Separating one monolayer from neighboring four layers. (b) Cleavage energy as a function of the separation distance for a fracture in  $C_{48}Cr$  bulk.

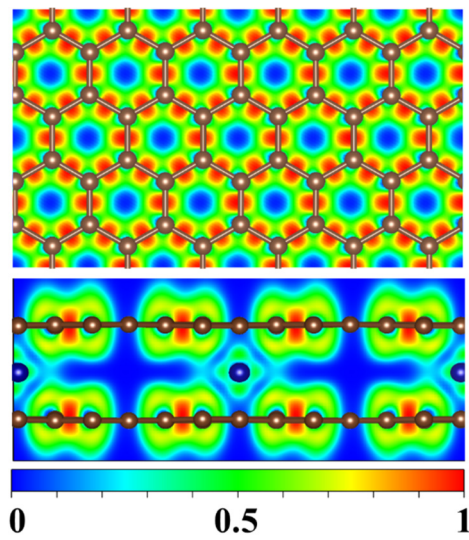

**Fig. S17** ELF contour planes in the graphene layer (top) and in the Cr and C plane (below).

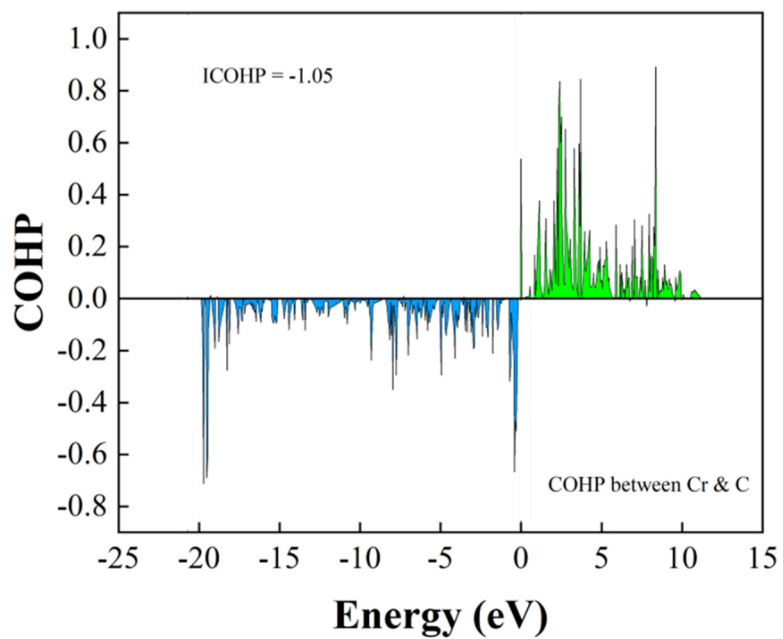

**Fig. S18** Crystal orbital Hamilton population (COHP) between C atoms and Cr atoms of C<sub>48</sub>Cr monolayer. The Fermi level in COHP figures is set to 0 eV.

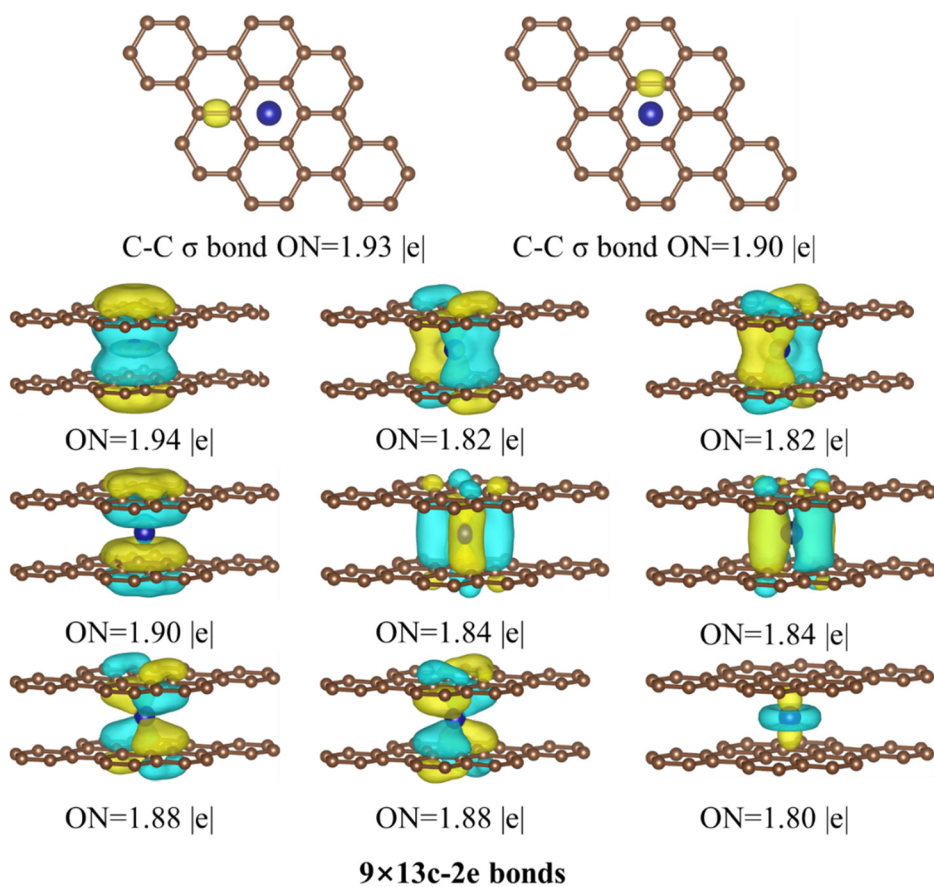

**Fig. S19** SSAdNDP analysis showing localized C-C 2c-2e and 13c-2e  $C_6CrC_6$  orbitals of  $C_{48}Cr$  monolayer.

**Table S1** The elastic constants (N/m), Young's modulus (N/m), and Poisson's ratio of the C<sub>48</sub>Cr monolayer.

|                    | <b>C<sub>11</sub></b> | <b>C<sub>12</sub></b> | <b>C<sub>66</sub></b> | <b>Y<sub>2D</sub></b> | <b><math>\nu</math></b> |
|--------------------|-----------------------|-----------------------|-----------------------|-----------------------|-------------------------|
| C <sub>48</sub> Cr | 704.58                | 128.17                | 288.21                | 681.27                | 0.182                   |

## Structural information of C<sub>12</sub>Cr monolayer

| Lattice parameters (Å, °)  | Wyckoff position, fractional coordinates |          |          |          |
|----------------------------|------------------------------------------|----------|----------|----------|
|                            |                                          | <i>x</i> | <i>y</i> | <i>z</i> |
| <i>a</i> = <i>b</i> = 4.33 | C                                        | 0.00000  | 0.33114  | 0.41863  |
| <i>c</i> = 20              | C                                        | 0.00000  | 0.66885  | 0.58136  |
| <i>α</i> = <i>β</i> = 90   | C                                        | 0.66885  | 0.66885  | 0.41863  |
| <i>γ</i> = 120             | C                                        | 0.33114  | 0.33114  | 0.58136  |
|                            | C                                        | 0.33114  | 0.00000  | 0.41863  |
|                            | C                                        | 0.66885  | 0.00000  | 0.58136  |
|                            | C                                        | 0.00000  | 0.66885  | 0.41863  |
|                            | C                                        | 0.00000  | 0.33114  | 0.58136  |
|                            | C                                        | 0.33114  | 0.33114  | 0.41863  |
|                            | C                                        | 0.66885  | 0.66885  | 0.58136  |
|                            | C                                        | 0.66885  | 0.00000  | 0.41863  |
|                            | C                                        | 0.33114  | 0.00000  | 0.58136  |
|                            | Cr                                       | 0.00000  | 0.00000  | 0.50000  |

## CONTCAR

C<sub>12</sub>Cr

1.0000000000000000

4.3358396679504736 0.0000000000000000 0.0000000000000000

-2.1679198339752368 3.7549472992437405 0.0000000000000000

0.0000000000000000 0.0000000000000000 0.0000000000000000

C Cr

12 1

Direct

-0.00000000000000017 0.3311484600076313 0.4186327284096203

0.00000000000000017 0.6688515399923686 0.5813673015903822

0.6688515399923668 0.6688515399923686 0.4186327284096203

0.3311484600076331 0.3311484600076314 0.5813673015903822

0.3311484600076348 0.0000000000000000 0.4186327284096203

0.6688515399923650 0.0000000000000000 0.5813673015903822

0.00000000000000017 0.6688515399923686 0.4186327284096203

-0.00000000000000017 0.3311484600076313 0.5813673015903822

0.3311484600076330 0.3311484600076313 0.4186327284096203

|                     |                    |                    |
|---------------------|--------------------|--------------------|
| 0.6688515399923668  | 0.6688515399923686 | 0.5813673015903822 |
| 0.6688515399923650  | 0.0000000000000000 | 0.4186327284096203 |
| 0.3311484600076348  | 0.0000000000000000 | 0.5813673015903822 |
| -0.0000000000000000 | 0.0000000000000000 | 0.5000000000000000 |



### Structural information of C<sub>48</sub>Cr monolayer

| Lattice parameters (Å, °)  | Wyckoff position, fractional coordinates |          |          |         |
|----------------------------|------------------------------------------|----------|----------|---------|
|                            | <i>x</i>                                 | <i>y</i> | <i>z</i> |         |
| <i>a</i> = <i>b</i> = 8.56 | C                                        | 0.50220  | 0.66689  | 0.10924 |
| <i>c</i> = 20              | C                                        | 0.66713  | 0.66568  | 0.11084 |
| <i>α</i> = <i>β</i> = 90   | C                                        | 0.83495  | 0.83350  | 0.11314 |
| <i>γ</i> = 120             | C                                        | 0.00226  | 0.66568  | 0.11082 |
|                            | C                                        | 0.16841  | 0.66690  | 0.10920 |
|                            | C                                        | 0.33617  | 0.83466  | 0.10921 |
|                            | C                                        | 0.50219  | 0.83464  | 0.10924 |
|                            | C                                        | 0.66713  | 0.00080  | 0.11085 |
|                            | C                                        | 0.83495  | 0.00079  | 0.11315 |
|                            | C                                        | 0.50203  | 0.66680  | 0.34403 |
|                            | C                                        | 0.66696  | 0.66559  | 0.34248 |
|                            | C                                        | 0.83480  | 0.83343  | 0.34034 |
|                            | C                                        | 0.00209  | 0.66561  | 0.34251 |
|                            | C                                        | 0.16823  | 0.66681  | 0.34405 |
|                            | C                                        | 0.33600  | 0.83455  | 0.34403 |
|                            | C                                        | 0.50203  | 0.83455  | 0.34403 |
|                            | C                                        | 0.66697  | 0.00072  | 0.34249 |
|                            | C                                        | 0.83479  | 0.00070  | 0.34035 |
|                            | C                                        | 0.00227  | 0.83351  | 0.11312 |
|                            | C                                        | 0.16955  | 0.00080  | 0.11310 |
|                            | C                                        | 0.33740  | 0.00082  | 0.11079 |
|                            | C                                        | 0.50232  | 0.16696  | 0.10920 |
|                            | C                                        | 0.66835  | 0.16695  | 0.10923 |
|                            | C                                        | 0.83611  | 0.33471  | 0.10925 |
|                            | C                                        | 0.00225  | 0.16809  | 0.11313 |
|                            | C                                        | 0.16954  | 0.16810  | 0.11312 |
|                            | C                                        | 0.33739  | 0.33593  | 0.11081 |
|                            | C                                        | 0.50230  | 0.33470  | 0.10920 |
|                            | C                                        | 0.66835  | 0.50074  | 0.10923 |
|                            | C                                        | 0.83610  | 0.50075  | 0.10925 |

|    |         |         |         |
|----|---------|---------|---------|
| C  | 0.00226 | 0.33593 | 0.11083 |
| C  | 0.16840 | 0.50086 | 0.10921 |
| C  | 0.33616 | 0.50087 | 0.10922 |
| C  | 0.00211 | 0.83344 | 0.34036 |
| C  | 0.16940 | 0.00073 | 0.34035 |
| C  | 0.33722 | 0.00071 | 0.34249 |
| C  | 0.50214 | 0.16686 | 0.34402 |
| C  | 0.66817 | 0.16686 | 0.34403 |
| C  | 0.83593 | 0.33463 | 0.34405 |
| C  | 0.00208 | 0.16801 | 0.34034 |
| C  | 0.16938 | 0.16802 | 0.34033 |
| C  | 0.33722 | 0.33584 | 0.34249 |
| C  | 0.50214 | 0.33462 | 0.34403 |
| C  | 0.66818 | 0.50064 | 0.34404 |
| C  | 0.83593 | 0.50065 | 0.34405 |
| C  | 0.00209 | 0.33584 | 0.34250 |
| C  | 0.16823 | 0.50077 | 0.34406 |
| C  | 0.33600 | 0.50078 | 0.34404 |
| Cr | 0.00224 | 0.00079 | 0.22673 |

## CONTCAR

C<sub>48</sub>Cr

1.0000000000000000

8.5674573337053097 0.0000000000000000 0.0000000000000000

-4.2838079128217972 7.4197174297130859 0.0000000000000000

0.0000000000000000 0.0000000000000000 15.0000000000000000

C Cr

48 1

Direct

0.5021963826564075 0.6668880620656950 0.1092362377798608

0.6671294126300111 0.6656798884387385 0.1108425844568970

0.8349516490405691 0.8335015690403864 0.1131411331607026

0.0022634066173097 0.6656843428165615 0.1108228476294784

0.1684063823126749 0.6669007717651851 0.1092044642011345

0.3361688364148350 0.8346576700768082 0.1092115697739828

0.5021936188840002 0.8346412935393630 0.1092363035617865

|                    |                    |                    |
|--------------------|--------------------|--------------------|
| 0.6671255361837609 | 0.0007968125927533 | 0.1108474814490350 |
| 0.8349540414436589 | 0.0007937135140210 | 0.1131472832413323 |
| 0.5020300526894772 | 0.6668005044170400 | 0.3440264151143708 |
| 0.6669631013280934 | 0.6655875383290777 | 0.3424774345002959 |
| 0.8347981986619359 | 0.8334259850509653 | 0.3403403107491556 |
| 0.0020867128068502 | 0.6656067879795842 | 0.3425115413997091 |
| 0.1682331247119535 | 0.6668101978565133 | 0.3440534895911824 |
| 0.3360001658167278 | 0.8345542058665032 | 0.3440342778470935 |
| 0.5020269183284043 | 0.8345502503319437 | 0.3440289365183418 |
| 0.6669703633329220 | 0.0007156591507638 | 0.3424903465736406 |
| 0.8347879695046814 | 0.0006998713334170 | 0.3403456746226610 |
| 0.0022653931246026 | 0.8335060070695448 | 0.1131183899183696 |
| 0.1695490658166747 | 0.0008043313516310 | 0.1131001413888271 |
| 0.3374032848000894 | 0.0008207329585588 | 0.1107890717549012 |
| 0.5023218217318899 | 0.1669574367195992 | 0.1091960075980722 |
| 0.6683464873240652 | 0.1669478276701284 | 0.1092341557995127 |
| 0.8361051240986228 | 0.3347149536333447 | 0.1092518346847555 |
| 0.0022460684056753 | 0.1680933925749954 | 0.1131318901892797 |
| 0.1695437223461553 | 0.1680977236560821 | 0.1131173818469549 |
| 0.3373895369985149 | 0.3359286595076014 | 0.1108129872542278 |
| 0.5023046773339601 | 0.3347036258694800 | 0.1092018436818947 |
| 0.6683481898412253 | 0.5007381550334884 | 0.1092298265220393 |
| 0.8361011152067306 | 0.5007476400667557 | 0.1092477731011101 |
| 0.0022571823927677 | 0.3359261252439936 | 0.1108281250604719 |
| 0.1684016613834061 | 0.5008618651932011 | 0.1092087939915842 |
| 0.3361597746631091 | 0.5008737638977010 | 0.1092195916979080 |
| 0.0021055571499602 | 0.8334430172262302 | 0.3403594374470487 |
| 0.1693987382470041 | 0.0007273533932377 | 0.3403494386909429 |
| 0.3372202759765557 | 0.0007093694212088 | 0.3424912917950209 |
| 0.5021431946877044 | 0.1668629572292559 | 0.3440198529687208 |
| 0.6681670659108008 | 0.1668605119991327 | 0.3440261847683246 |
| 0.8359262962260061 | 0.3346277873509180 | 0.3440455065719092 |
| 0.0020760594452227 | 0.1680053633003880 | 0.3403381287440652 |
| 0.1693816735091005 | 0.1680194232810592 | 0.3403283318885713 |
| 0.3372199808969114 | 0.3358398455198426 | 0.3424856363781359 |
| 0.5021422010849861 | 0.3346236129165092 | 0.3440271701213007 |
| 0.6681757096507468 | 0.5006441764461016 | 0.3440423303952471 |
| 0.8359339002319643 | 0.5006532825300383 | 0.3440540107077794 |
| 0.0020900919011240 | 0.3358446447262793 | 0.3425028652105411 |
| 0.1682348592023075 | 0.5007720394993669 | 0.3440637661021313 |
| 0.3359966710846862 | 0.5007778960696712 | 0.3440433701797261 |
| 0.0022383859631461 | 0.0007913574793292 | 0.2267266003699007 |
